# Supplementary material for: Encapsulation of Lactobacillus gasseri: Characterization, Probiotic Survival, In Vitro Evaluation and Viability in Apple Juice
Source: MDPI journal article supplement (doi:10.3390/foods11050740), 2022-03-02
Supplement: s1 [file s1]

## Supplementary Material

**Table S1.** Viability of capsules loaded with *Lactobacillus gasseri*.

| Method | log CFU/mL (N <sub>0</sub> ) | log CFU/mL (N)             | Viability (%) |
|--------|------------------------------|----------------------------|---------------|
| ALG UT | 7.420 ± 0.059 <sup>a</sup>   | 4.877 ± 0.211 <sup>b</sup> | 65.73         |
| ALG AM | 7.372 ± 0.080 <sup>a</sup>   | 4.858 ± 0.199 <sup>b</sup> | 65.90         |

ALG AM = Alginate with pretreatment magnetic stirring; ALG UT = Alginate with pretreatment Ultraturrax®, N<sub>0</sub> = initial concentration and N = final concentration. Means ± SD (*p* < 0.05). Equal letters between columns means that there is no statistically significant difference.

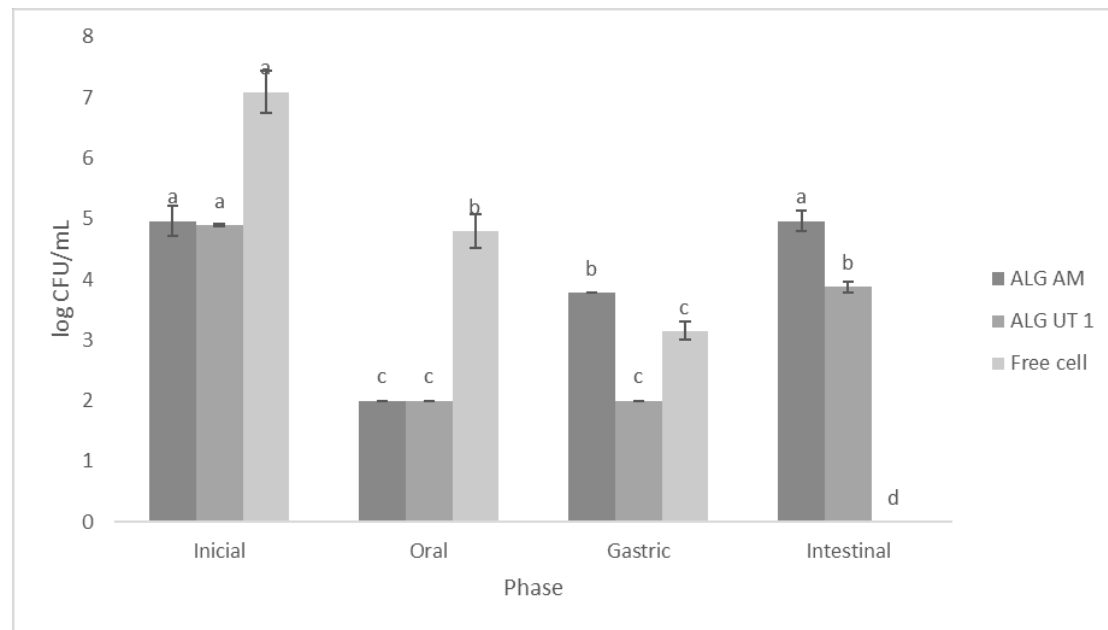

**Figure S1.** Survival of *Lactobacillus gasseri* at in vitro gastrointestinal conditions of the ALG AM, ALG UT, and cell-free systems (*n* = 2). LG AM = Alginate with pretreatment magnetic stirring; ALG UT = Alginate with pretreatment Ultraturrax®. Means ± SD (*p* < 0.05). Equal letters means that there is no statistically significant difference.
